# Supplementary material for: Insight into the factors influencing the photocatalytic H2 evolution performance of molybdenum sulfide
Source: Royal Society of Chemistry journal article supplement (doi:10.1039/c8nj04639e), 2018-12-05
Supplement: c8nj04639e1.pdf [file c8nj04639e1.pdf]

## Supporting information

### Insight into the factors influencing the photocatalytic H<sub>2</sub> evolution performance of molybdenum sulfide

Mingcai Yin<sup>\*</sup>, Wenli Zhang, Chaojun Wu, Fangfang Jia, Yaoting Fan, Zhongjun Li

College of Chemistry and Molecular Engineering, Zhengzhou University, No.100 of Kexue Road,

Zhengzhou 450001, P R China

<sup>\*</sup>Authors to whom correspondence should be addressed.

Corresponding authors: E-mail: mcyin@zzu.edu.cn

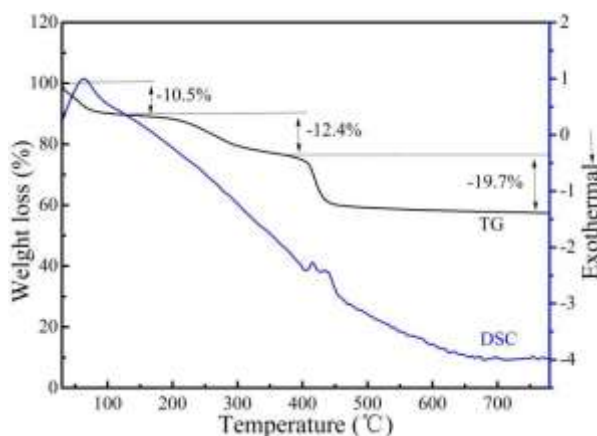

**Fig. S1** TG-DSC curves of the amorphous MoS<sub>3</sub> in Ar atmosphere.

**Table S1** Atomic ratio of S and Mo obtained by quantitative XPS analysis

| Sample                 | Ratio (S <sub>2</sub> <sup>2-</sup> ) | Ratio (S <sup>2-</sup> ) | Ratio (S <sub>2</sub> <sup>2-</sup> /S <sup>2-</sup> ) | S/Mo |
|------------------------|---------------------------------------|--------------------------|--------------------------------------------------------|------|
| 300-MoS <sub>2+x</sub> | 57.9%                                 | 42.1%                    | 1.4                                                    | 2.78 |
| 350-MoS <sub>2+x</sub> | 55.0%                                 | 45.0%                    | 1.2                                                    | 2.40 |
| 400-MoS <sub>2+x</sub> | --                                    | 100%                     | --                                                     | 1.84 |

**Table S2** Microstructure of MoS<sub>2+x</sub> synthesized at different temperatures

| Sample                 | S <sub>BET</sub><br>(m <sup>2</sup> /g) | Pore volume<br>(cm <sup>3</sup> /g) | Pore diameter<br>(nm) |
|------------------------|-----------------------------------------|-------------------------------------|-----------------------|
| 200-MoS <sub>2+x</sub> | 8.6                                     | 0.03                                | 6.3                   |
| 300-MoS <sub>2+x</sub> | 23.6                                    | 0.16                                | 22.8                  |
| 350-MoS <sub>2+x</sub> | 14.4                                    | 0.052                               | 12.5                  |
| 400-MoS <sub>2+x</sub> | 110.7                                   | 0.21                                | 7.1                   |
| 500-MoS <sub>2+x</sub> | 70.3                                    | 0.32                                | 14.9                  |

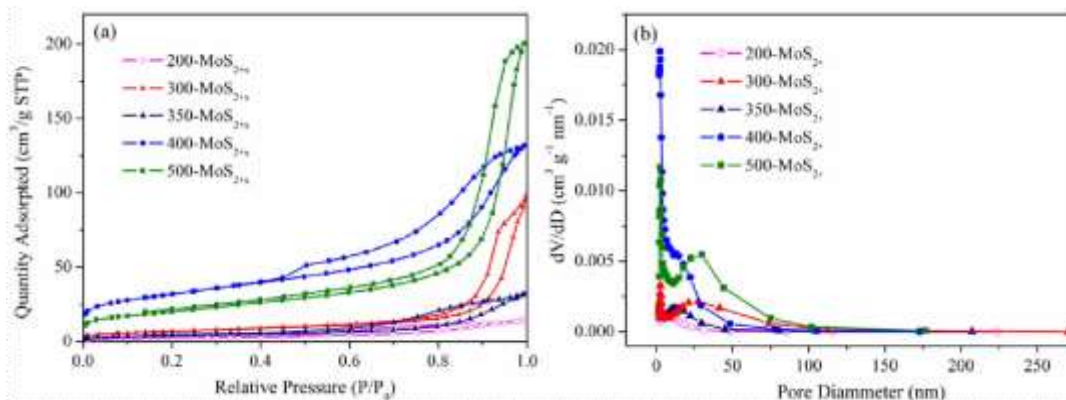

**Fig. S2** N<sub>2</sub> adsorption-desorption isotherms (a) and BJH pore-size distribution curves (b) for MoS<sub>2+x</sub> samples obtained at different temperatures.

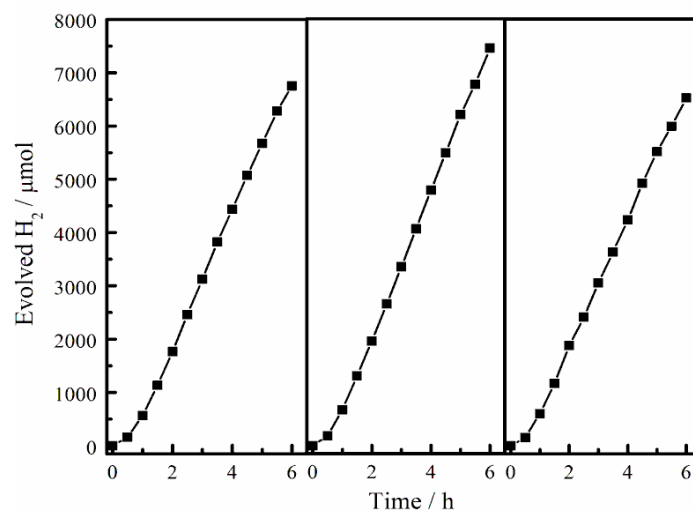

Fig. S3 Recycling test of H<sub>2</sub> evolution over 400-MoS<sub>2+x</sub> in 200 mL 10 vol% TEOA aqueous solution containing 0.1 g catalyst, 7.5 mM EB, pH 9.0. In the second and third cycles, EB and TEOA were added into the new system again. (Note: the discrepancy with Fig. 5 in H<sub>2</sub> evolution activity is because that the sample was not the same batch.)

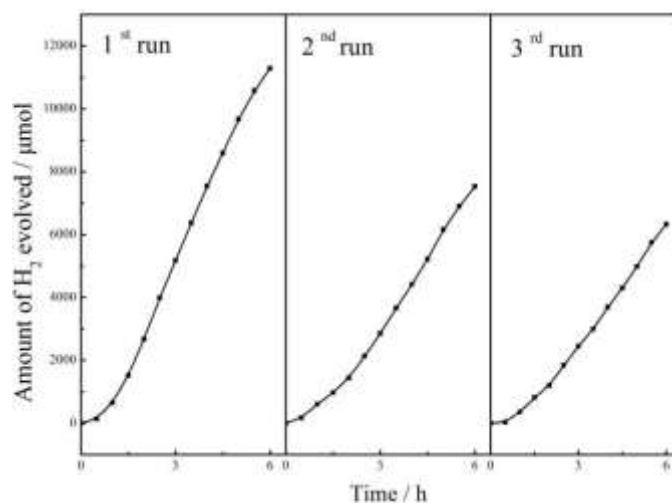

**Fig. S4** Recycling test of H<sub>2</sub> evolution over 300-MoS<sub>2+x</sub> in 200 mL 10 vol% TEOA aqueous solution containing 0.1 g catalyst, 7.5 mM EB, pH 9.0. In the second and third cycles, EB and TEOA were added into the new system again.

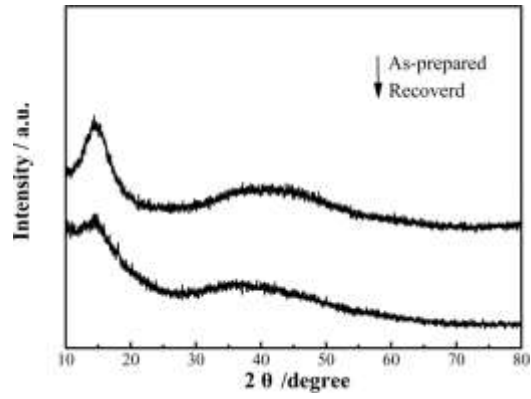

**Fig. S5** XRD patterns of 300-MoS<sub>2+x</sub> samples as-prepared and recovered after H<sub>2</sub> evolution reaction.

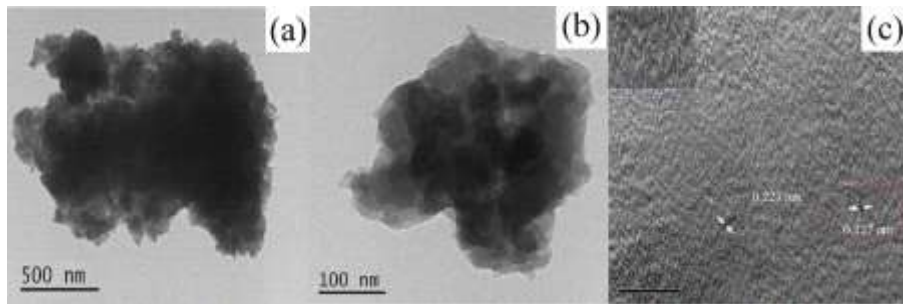

**Fig. S6** TEM (a, b) and HRTEM (c) images of 300-MoS<sub>2+x</sub> recovered after H<sub>2</sub> evolution reaction.

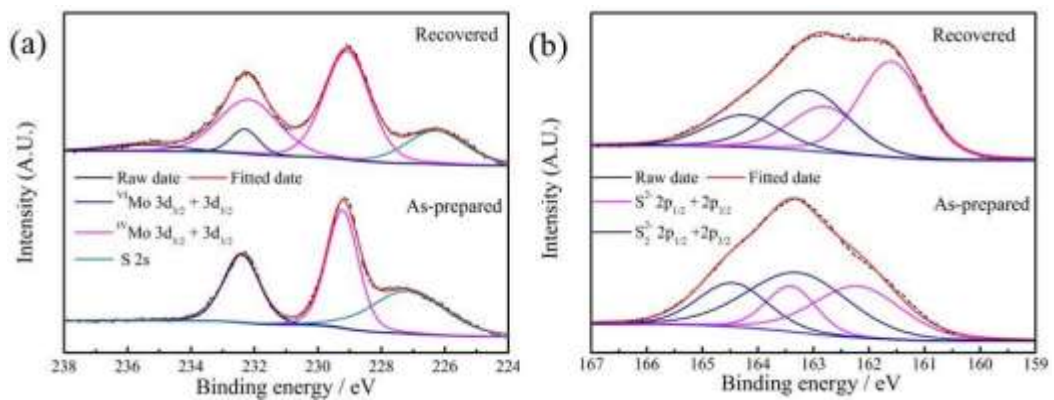

**Fig. S7** High resolution XPS spectra of Mo 3d (a) and S 2p (b) for the 300-MoS<sub>2+x</sub> samples as-prepared and recovered after reaction.

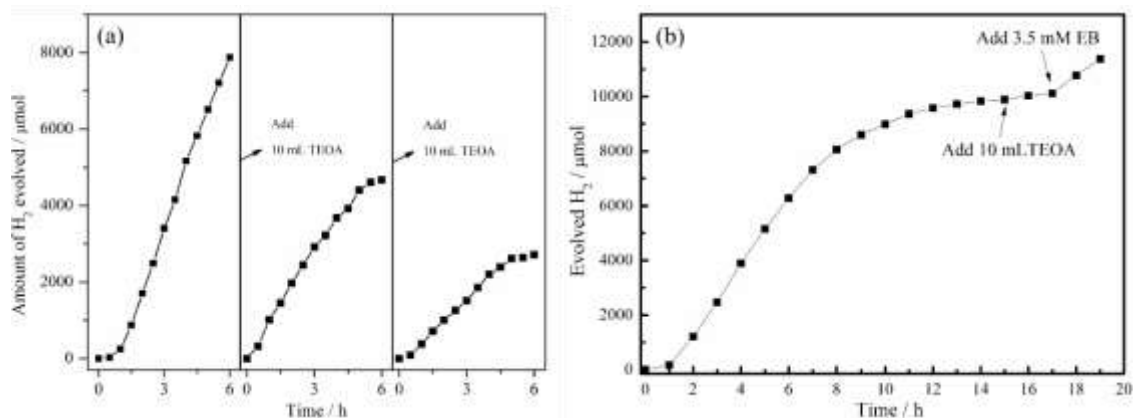

Fig. S8 (a) Recycling test of H<sub>2</sub> evolution over 300-MoS<sub>2+x</sub> in 200 mL of TEOA aqueous solution containing 0.1 g catalyst, 7.5 mM EB, pH 9.0. In the second and third cycles, only 10 mL TEOA were readded into the original system. (b) Time course of hydrogen production over 300-MoS<sub>2+x</sub> in 200 mL of TEOA aqueous solution containing 0.1 g catalyst, 7.5 mM EB, pH 9.0. At the time of 15 h and 17 h, 10 mL TEOA and 3.3 mM EB were added again, respectively. (Note: the discrepancy with Fig. S4 in H<sub>2</sub> evolution activity is because that the sample was not the same batch.)

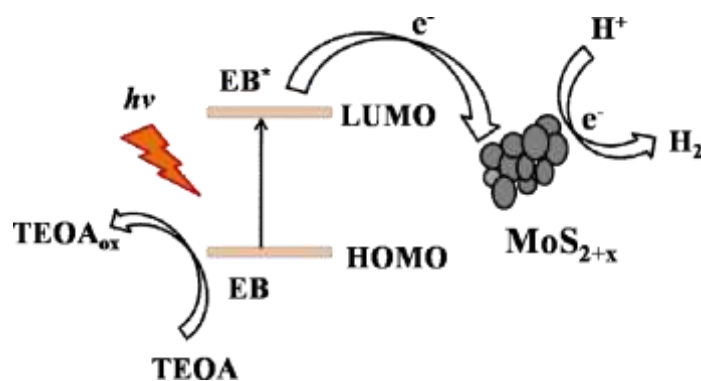

Fig. S9 Photocatalytic hydrogen production mechanism of MoS<sub>2+x</sub> sensitized by EB.
